# Supplementary material
Source: PubMed Central journal article supplement (PMC2916861)
Supplement: NIHMS207916-supplement-Supp_Fig_s1___Table_s1.pdf [file NIHMS207916-supplement-Supp_Fig_s1___Table_s1.pdf]

**Table S1.** Summary of Aer substitutions and possible roles of the native amino acids

| Substitution and signaling phenotype <sup>a</sup> |                            |        | Group <sup>b</sup> | Possible role based on phenotype <sup>a</sup> , residue conservation <sup>b</sup> , position in the <i>in silico</i> model <sup>c</sup> , or function in other PAS domains <sup>d</sup>                                                                                                                                                       |
|---------------------------------------------------|----------------------------|--------|--------------------|-----------------------------------------------------------------------------------------------------------------------------------------------------------------------------------------------------------------------------------------------------------------------------------------------------------------------------------------------|
| OFF                                               | ON                         | ND     |                    |                                                                                                                                                                                                                                                                                                                                               |
|                                                   | T8W                        |        | 1                  | N-cap structure. Substitution: (Watts et al., 2006)                                                                                                                                                                                                                                                                                           |
|                                                   | T12C                       |        | 4                  | N-cap structure. Substitution: (Watts et al., 2006)                                                                                                                                                                                                                                                                                           |
|                                                   | L14A,H,<br>N,P             |        | 4                  | In AvNifL, the equivalently positioned residue hydrogen bonds to Asn51 in the PAS core; may stabilize the N-cap to the PAS core. Substitutions: (Watts et al., 2006)                                                                                                                                                                          |
|                                                   | D17G*                      |        | 4                  | N-cap structure. First residue in N-cap loop. Substitution: (Watts et al., 2006)                                                                                                                                                                                                                                                              |
|                                                   | T18I, N                    |        | 4                  | Possible hinge in the N-cap loop. Substitution: this study                                                                                                                                                                                                                                                                                    |
| T19S                                              | T19A<br>E,I,L,K*,<br>P*,R* |        | 4                  | Inverted response: K,P,R. Possible hinge in the N-cap loop. Substitutions: this study; (Watts et al., 2006)                                                                                                                                                                                                                                   |
| L20K                                              | L20P,Q<br>C,T*             |        | 2                  | Near N-cap loop; may be involved in signaling; Substitutions: (Watts et al., 2006)                                                                                                                                                                                                                                                            |
| M21K,<br>D,P                                      | M21T,<br>S                 |        | 4                  | Near N-cap loop; may be involved in signaling; Substitutions: (Watts et al., 2006)                                                                                                                                                                                                                                                            |
| S22P                                              |                            | S22P,F | 2                  | In AvNifL, S39 is part of a network of bond donors and acceptors that facilitate uptake and release of protons at N5. Substitutions: this study; (Bibikov et al., 2000)                                                                                                                                                                       |
| T24P                                              |                            |        | 2                  | FAD-binding defective; likely important for structure. Substitution: this study                                                                                                                                                                                                                                                               |
| D25V                                              |                            |        | 2                  | Low stability, rapid proteolysis; in PYP, D34 forms critical bonds for stabilizing fold; likely important for structure. Substitution: this study                                                                                                                                                                                             |
|                                                   | S28C                       |        | 4                  | More often glycine in PAS_FAD1 and PAS_FAD2 subfamilies; may be critical for stability near FAD. Substitution: this study                                                                                                                                                                                                                     |
| I30N                                              |                            |        | 2                  | Low stability; may be important for structure. Substitution: this study                                                                                                                                                                                                                                                                       |
| T31A                                              |                            |        | 1                  | Substitution: this study                                                                                                                                                                                                                                                                                                                      |
| H32R                                              |                            |        | 4                  | FAD-binding defect; may be involved in structure. Substitution: this study                                                                                                                                                                                                                                                                    |
| N34H, K                                           | N34C,D                     |        | 3                  | In AvNifL, N51 interacts with V31 (equivalent to Aer L14) to form a structurally continuous helix (N-cap and C $\alpha$ helix) that is discontinuous in sequence; in PYP, N43 forms critical hydrogen bonds for stabilizing fold; likely important for structure. Substitutions: this study; C, (Repik et al., 2000); D, (Watts et al., 2004) |
| D35G,<br>N, V                                     |                            |        | 4                  | D35V has low stability with rapid proteolysis; likely important for structure. Substitutions: this study                                                                                                                                                                                                                                      |
| F37I                                              |                            |        | 3                  | In AvNifL, the side chain of F54 separates water cavities; likely important for structure. Substitution: this study                                                                                                                                                                                                                           |
| S41R                                              |                            |        | 2                  | Low stability; in PYP, T50 binds the phenolic hydroxyl at the buried tip of the chromophore; likely important for structure. Substitution: this study                                                                                                                                                                                         |
| G42C                                              |                            |        | 3                  | Substitution: (Repik et al., 2000)                                                                                                                                                                                                                                                                                                            |

|                   |            |      |   |                                                                                                                                                                                                                                                                                                                                                                        |
|-------------------|------------|------|---|------------------------------------------------------------------------------------------------------------------------------------------------------------------------------------------------------------------------------------------------------------------------------------------------------------------------------------------------------------------------|
| Y43N              |            |      | 3 | FAD-binding defective; in PYP, R52 binds the phenolic hydroxyl at the buried tip of the chromophore; may be important for structure. Substitution: this study                                                                                                                                                                                                          |
| E47C              |            |      | 3 | Substitution: (Repik et al., 2000)                                                                                                                                                                                                                                                                                                                                     |
| L48S              |            |      | 2 | FAD-binding defective; may be important for structure. Substitution: this study                                                                                                                                                                                                                                                                                        |
| H53R              | H53Y       |      | 3 | In AvNifL, E70 lies directly over the N5 atom of the isoalloxazine ring and is poised to accept a proton from the reduced form of the FAD; In Vivid, C108 forms a light-induced, covalent flavin-cysteiny adduct; In MmoS, the side chain of H132 is 3.2 Å from N5 and proposed to play a role in protonation and deprotonation of N1 and N5. Substitution: this study |
|                   | N54D       |      | 1 | In MmoS, the side chain of R133 stabilizes the FAD ribityl chain. Substitution: this study                                                                                                                                                                                                                                                                             |
| R57C <sup>Δ</sup> | R57C,<br>H | R57H | 1 | Highly conserved RHPDMP motif; important for structure/function; In MmoS, the side chain of N136 binds a common water molecule with O2 of FAD. Substitutions: this study; C, (Repik et al., 2000); H, (Bibikov et al., 2000)                                                                                                                                           |
| H58R,C            |            |      | 1 | Highly conserved RHPDMP motif; likely important for structure/function. Substitutions: this study; (Repik et al., 2000)                                                                                                                                                                                                                                                |
| D60V, C           |            | D60N | 1 | Highly conserved RHPDMP motif; likely important for structure/function. Substitutions: this study; C, (Repik et al., 2000); D, (Bibikov et al., 2000)                                                                                                                                                                                                                  |
| M61K              |            |      | 1 | Highly conserved RHPDMP motif; likely important for structure/function; Substitution: this study                                                                                                                                                                                                                                                                       |
| P62Q              |            | P62T | 1 | Highly conserved RHPDMP motif; likely important for structure/function. Substitutions: this study; (Bibikov et al., 2000)                                                                                                                                                                                                                                              |
|                   | F66L       |      | 1 | May be important for signaling                                                                                                                                                                                                                                                                                                                                         |
| D68G,<br>N, V, C  |            |      | 2 | D68G has an FAD-binding defect; D68N, V have low stability; may be important for structure. Substitutions: this study; (Repik et al., 2000)                                                                                                                                                                                                                            |
| M69T              | M69I, K    | M69V | 2 | In MmoS, M148 is 6 Å from the FAD isoalloxazine ring; posited to mediate redox potential. Substitutions: this study; (Bibikov et al., 2000)                                                                                                                                                                                                                            |
|                   | W70R       |      | 3 | In AvNifL, the side chain of W87 stacks with the adenine base and H-bonds to the FAD ribityl; In MmoS, W149 stacks with the adenine ring and may mediate electron transfer from membrane and W158 (Aer-W79) to FAD. Substitution: this study                                                                                                                           |
| T72I              |            |      | 2 | Low stability; may be important for structure. Substitution: this study                                                                                                                                                                                                                                                                                                |
| G76E              |            |      | 2 | This was the only leaky mutant protein that recovered normal aerotaxis function in a temporal assay at 200 μM IPTG induction. Substitution: this study                                                                                                                                                                                                                 |
| E77G              |            |      | 4 | FAD-binding defect; partial loss of function. Substitution: this study                                                                                                                                                                                                                                                                                                 |
| W79R,S,<br>C      |            |      | 2 | In MmoS, W158 was postulated to facilitate electron transfer from the membrane redox component to W149 (Aer-W70), then FAD. Substitution: this study; (Repik et al., 2000)                                                                                                                                                                                             |
| S80I              |            |      | 4 | Substitution: this study                                                                                                                                                                                                                                                                                                                                               |
| G81D              |            |      | 2 | FAD-binding defective; may be important for structure. Substitution: this study                                                                                                                                                                                                                                                                                        |

|                |                    |              |   |                                                                                                                                                                          |
|----------------|--------------------|--------------|---|--------------------------------------------------------------------------------------------------------------------------------------------------------------------------|
|                | N85D,<br>S         |              |   | In AvNifL, N102, and in MmoS, N164 binds to the N3 and O4 of FAD. Substitution: this study                                                                               |
| R87H, P        |                    |              | 4 | Substitution: this study                                                                                                                                                 |
| <i>G90C</i>    |                    |              | 3 | On a loop between G $\beta$ and H $\beta$ . Substitution: (Repik et al., 2000)                                                                                           |
| Y93C, H        |                    | <i>Y93H</i>  | 2 | In AvNifL, Y110 is part of a network of bond donors and acceptors that facilitate uptake and release of protons at N5. Substitutions: this study; (Bibikov et al., 2000) |
| W94G,<br>L, R  |                    |              | 3 | W94G has an FAD-binding defect; W94L,R have low stability; may be important for structure. Substitution: this study                                                      |
| V95A           |                    |              | 2 | Low stability, rapid proteolysis; likely important for structure. Substitution: this study                                                                               |
|                | A97D               |              | 3 | May be involved in signaling. Substitution: this study                                                                                                                   |
|                | N98I               |              | 4 | May be involved in signaling. Substitution: this study                                                                                                                   |
|                | V100L              |              | 4 | May be involved in signaling. Substitution: this study                                                                                                                   |
| P101L          |                    |              | 3 | High conservation in all PAS subfamilies; likely important for structure. Substitution: this study                                                                       |
|                | <i>V103G</i>       |              | 4 | Substitution: (Burón-Barral et al., 2006).                                                                                                                               |
| R104H,<br>L,C  |                    |              | 4 | Substitutions: this study; (Bibikov et al., 2000)                                                                                                                        |
| G110D          |                    | <i>G110S</i> | 1 | Low stability, rapid proteolysis; may be important for structure. Substitutions: this study; (Bibikov et al., 2000)                                                      |
| Y111N          | <i>Y111C*</i>      |              | 2 | C, inverted response. May be involved in signaling. Substitutions: this study; (Repik et al., 2000)                                                                      |
| <i>M112K</i>   | M112I,<br>T,V,V,I, |              | 4 | In AvNifL, L130 in the I $\beta$ -strand packs against the N-cap of the opposite monomer. Substitutions: this study; (Burón-Barral et al., 2006)                         |
| S113L,<br>P, P | S113T              |              | 2 | In MmoS, the S193 side chain binds a common water molecule with the N5 of FAD. Substitutions: this study; (Burón-Barral et al., 2006)                                    |
|                | <i>I114C</i>       |              | 4 | Usually valine in PAS_FAD1 subfamily. Rescued by Tar. May contact HAMP domain (K. Watts, unpublished). Substitution: (Campbell, 2010)                                    |

\*, inverted response, where cells were constantly tumbling in air, and smooth in nitrogen.

<sup>Δ</sup>, a previous result in which His-tagged Aer-R57C was identified as a signal-off mutant that lacked FAD binding (Repik et al., 2000). This result was likely due to the low stability of the His-tagged construct.

**a.** Phenotypes: Signal-on, signal-off, ND (not determined; these are from previous studies), FAD-binding defect, low stability. Substitutions identified in previous studies are in italics.

**b.** Group 1: Substitutions at residues that are conserved in the PAS\_FAD1 (Aer) subfamily only; Group 2: Substitutions at residues that are conserved in the PAS\_FAD1 subfamily and at least one FAD-binding (non-Aer) PAS domain; Group 3: Substitutions at residues that are conserved in PAS\_FAD1, PAS\_FAD2 (AerC) and at least one FAD-binding (non-Aer) PAS domain; Group 4: Substitutions at residues that are not conserved within any group. Sequence conservation and domain architecture are from (Xie *et al.*, 2010).

c. The Aer-PAS domain was modeled from the resolved structure of AvNifL [2GJ3; (Key *et al.*, 2007)].

d. Analyses of PYP, Mmos, AvNifL and Vivid are from (Pellequer *et al.*, 1998), (Ukaegbu & Rosenzweig, 2009), (Key *et al.*, 2007) and (Zoltowski *et al.*, 2007), respectively.

## References

- Bibikov, S. I., L. A. Barnes, Y. Gitin & J. S. Parkinson, (2000) Domain organization and flavin adenine dinucleotide-binding determinants in the aerotaxis signal transducer Aer of *Escherichia coli*. *Proc Natl Acad Sci U S A* **97**: 5830-5835.
- Burón-Barral, M. C., K. K. Gosink & J. S. Parkinson, (2006) Loss- and gain-of-function mutations in the F1-HAMP region of the *Escherichia coli* aerotaxis transducer Aer. *J Bacteriol* **188**: 3477-3486.
- Campbell, A. J., (2010) Structural dynamics and signaling roles of the Aer PAS and F1 regions. In: Department of Microbiology and Molecular Genetics. Loma Linda, CA: Loma Linda University, pp. 167.
- Key, J., M. Hefti, E. B. Purcell & K. Moffat, (2007) Structure of the redox sensor domain of *Azotobacter vinelandii* NifL at atomic resolution: signaling, dimerization, and mechanism. *Biochemistry* **46**: 3614-3623.
- Pellequer, J. L., K. A. Wager-Smith, S. A. Kay & E. D. Getzoff, (1998) Photoactive yellow protein: a structural prototype for the three-dimensional fold of the PAS domain superfamily. *Proc Natl Acad Sci U S A* **95**: 5884-5890.
- Repik, A., A. Rebbapragada, M. S. Johnson, J. O. Haznedar, I. B. Zhulin & B. L. Taylor, (2000) PAS domain residues involved in signal transduction by the Aer redox sensor of *Escherichia coli*. *Mol Microbiol* **36**: 806-816.
- Ukaegbu, U. E. & A. C. Rosenzweig, (2009) Structure of the Redox Sensor Domain of *Methylococcus capsulatus* (Bath) MmoS. *Biochemistry* **48**: 2207-2215.
- Watts, K. J., Q. Ma, M. S. Johnson & B. L. Taylor, (2004) Interactions between the PAS and HAMP domains of the *Escherichia coli* aerotaxis receptor Aer. *J Bacteriol* **186**: 7440-7449.
- Watts, K. J., K. Sommer, S. L. Fry, M. S. Johnson & B. L. Taylor, (2006) Function of the N-terminal cap of the PAS domain in signaling by the aerotaxis receptor Aer. *J Bacteriol* **188**: 2154-2162.
- Xie, Z., L. E. Ulrich, I. B. Zhulin & G. Alexandre, (2010) PAS domain containing chemoreceptor couples dynamic changes in metabolism with chemotaxis. *Proc Natl Acad Sci U S A* **107**: 2235-2240.
- Zoltowski, B. D., C. Schwerdtfeger, J. Widom, J. J. Loros, A. M. Bilwes & B. R. Crane, (2007) Conformational switching in the fungal light sensor Vivid. *Science* **316**: 1054-1057.

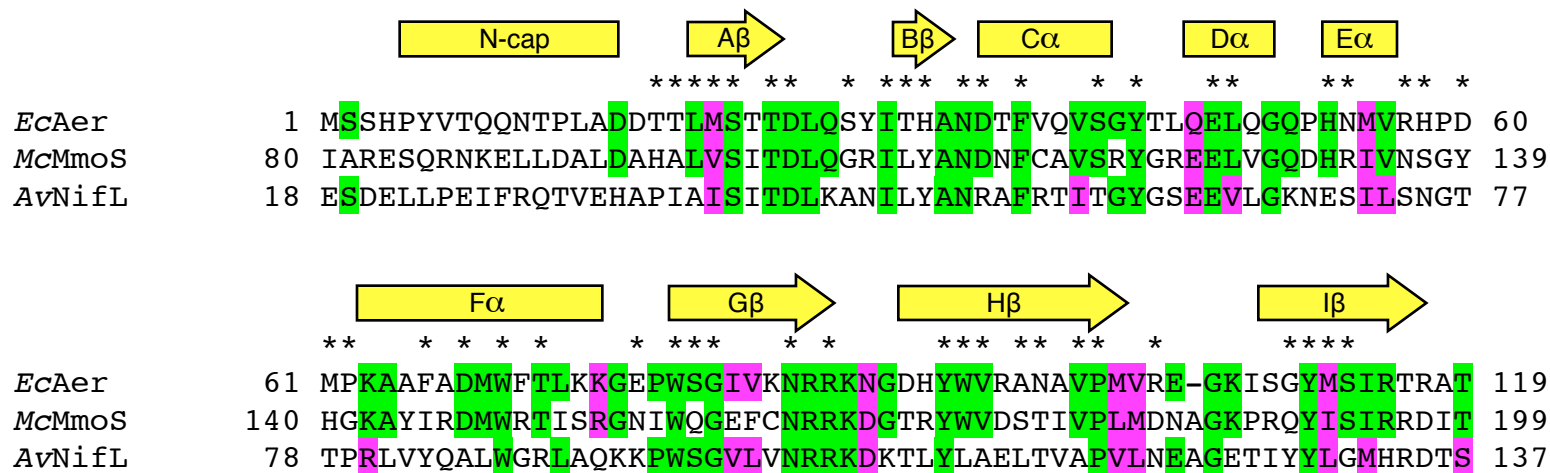

Fig. S1. Sequence alignment of the PAS domains of Aer from *E. coli*, MmoS (PAS-A) from *Methylococcus capsulatus* (Ukaegbu & Rosenzweig, 2009), and NifL from *Azotobacter vinelandii* (Key *et al.*, 2007). Residues identical to those of Aer are highlighted in green, while those similar to Aer are highlighted in magenta. The predicted secondary structural elements for Aer are shown as yellow rectangles for helices and as arrows for  $\beta$ -strands. Positions where amino acid substitutions altered Aer function are marked with an asterisk (\*). The alignment was made with ClustalW (Larkin *et al.*, 2007), after which residue Aer-E105 was moved one position to the left to align with NifL-E122.

## References

- Key, J., M. Hefti, E. B. Purcell & K. Moffat, (2007) Structure of the redox sensor domain of *Azotobacter vinelandii* NifL at atomic resolution: signaling, dimerization, and mechanism. *Biochemistry* **46**: 3614-3623.
- Larkin, M. A., G. Blackshields, N. P. Brown, R. Chenna, P. A. McGettigan, H. McWilliam, F. Valentin, I. M. Wallace, A. Wilm, R. Lopez, J. D. Thompson, T. J. Gibson & D. G. Higgins, (2007) Clustal W and Clustal X version 2.0. *Bioinformatics* **23**: 2947-2948.
- Ukaegbu, U. E. & A. C. Rosenzweig, (2009) Structure of the Redox Sensor Domain of *Methylococcus capsulatus* (Bath) MmoS. *Biochemistry* **48**: 2207-2215.
